# Supplementary material for: Dioxin (TCDD) Induces Epigenetic Transgenerational Inheritance of Adult Onset Disease and Sperm Epimutations
Source: PubMed Central journal article supplement (PMC3458876; doi:10.1371/journal.pone.0046249), 2012-09-26

Supplemental Figure 1

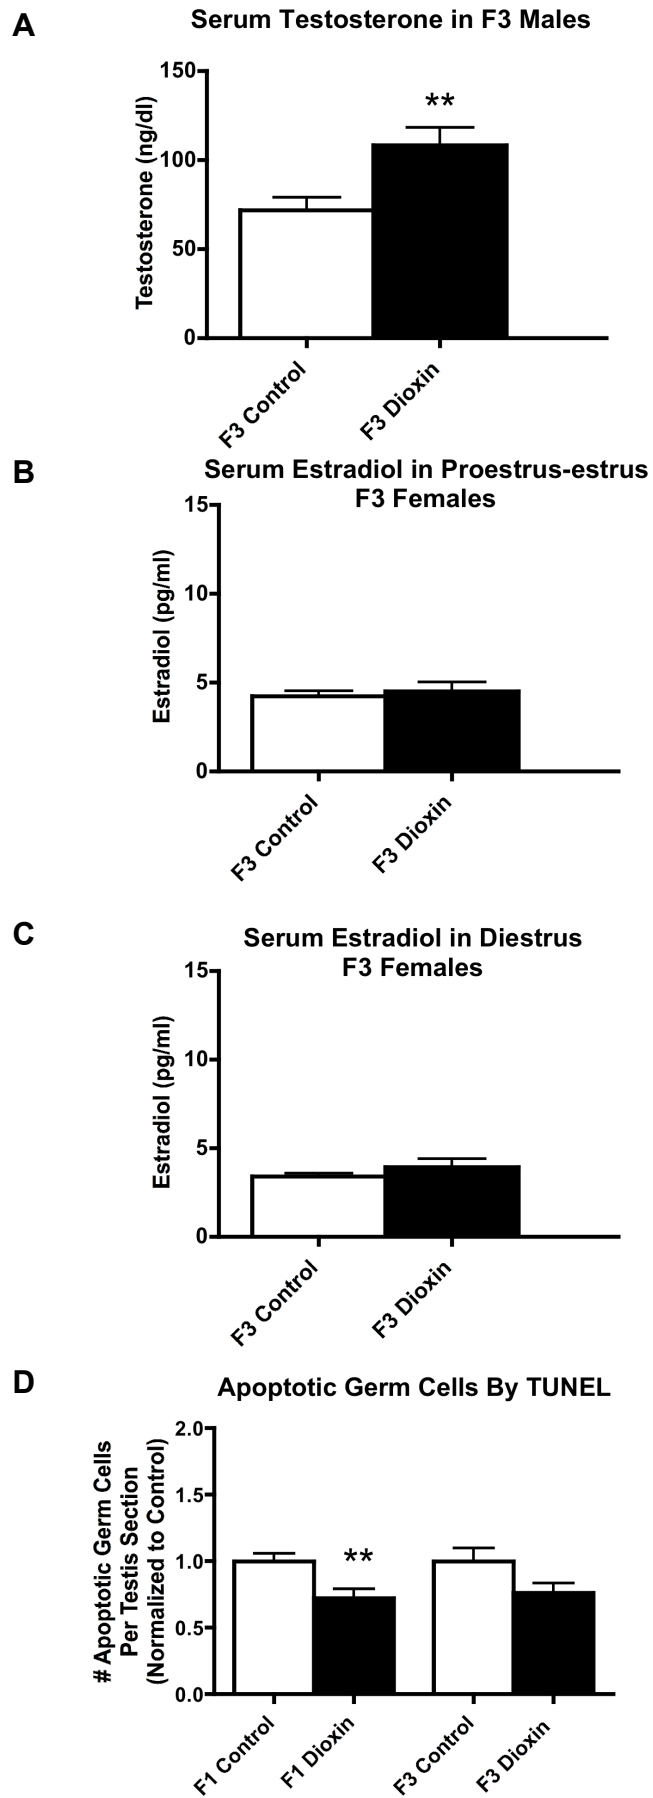

Supplement: pone.0046249.s001.pdf [file pone.0046249.s001.pdf]
