# Supplementary material for: Dioxin (TCDD) Induces Epigenetic Transgenerational Inheritance of Adult Onset Disease and Sperm Epimutations
Source: PubMed Central journal article supplement (PMC3458876; doi:10.1371/journal.pone.0046249), 2012-09-26
Supplement: pone.0046249.s002.pdf [file pone.0046249.s002.pdf]

**Supplemental Table S1A.** Body weight and organ weights in F1 and F3 generation female rats of control and dioxin lineages (mean  $\pm$  standard error).

| Generation | Treatment | Sex | Body Weight (grams)   | Ovaries (% of BW)      | Uterus (% BW)          | Kidney (% BW)            |
|------------|-----------|-----|-----------------------|------------------------|------------------------|--------------------------|
| F1         | Control   | F   | 310.9<br>$\pm$ 6.15   | 0.0532<br>$\pm$ 0.0032 | 0.2589<br>$\pm$ 0.0209 | 0.3276<br>$\pm$ 0.0127   |
| F1         | Dioxin    | F   | 280.2**<br>$\pm$ 6.80 | 0.0485<br>$\pm$ 0.0048 | 0.2594<br>$\pm$ 0.0297 | 0.3245<br>$\pm$ 0.0123   |
| F3         | Control   | F   | 293.6<br>$\pm$ 2.31   | 0.0501<br>$\pm$ 0.0011 | 0.3883<br>$\pm$ 0.0150 | 0.3567<br>$\pm$ 0.0036   |
| F3         | Dioxin    | F   | 291.6<br>$\pm$ 3.96   | 0.0507<br>$\pm$ 0.0018 | 0.3304<br>$\pm$ 0.0173 | 0.3405**<br>$\pm$ 0.0049 |

Asterisks (\*\*), if present, indicate statistically significant differences between means of control and dioxin lineage rats ( $P < 0.01$ ). The number of animals were as follows: F1 control, 20, F1 dioxin, 9, F3 control 69, F3 dioxin 41.

**Supplemental Table S1B.** Body weight and organ weights in F1 and F3 generation male rats control and dioxin lineages (mean  $\pm$  standard error).

| Generation | Treatment | Sex | Body Weight (grams)    | Testis (% BW)           | Prostate (% BW)          | Seminal Vesicle (% BW) | Epididymis (% BW)      | Kidney (% BW)            |
|------------|-----------|-----|------------------------|-------------------------|--------------------------|------------------------|------------------------|--------------------------|
| F1         | Control   | M   | 545.3<br>$\pm$ 8.66    | 0.7599<br>$\pm$ 0.0154  | 0.2239<br>$\pm$ 0.0076   | 0.1395<br>$\pm$ 0.0092 | 0.2585<br>$\pm$ 0.0045 | 0.3821<br>$\pm$ 0.0092   |
| F1         | Dioxin    | M   | 527.2<br>$\pm$ 9.65    | 0.8166*<br>$\pm$ 0.0225 | 0.1881**<br>$\pm$ 0.0076 | 0.1490<br>$\pm$ 0.0171 | 0.2675<br>$\pm$ 0.0075 | 0.3383**<br>$\pm$ 0.0068 |
| F3         | Control   | M   | 515.80<br>$\pm$ 6.09   | 0.8153<br>$\pm$ 0.0102  | 0.1970<br>$\pm$ 0.0041   | 0.1330<br>$\pm$ 0.0038 | 0.2628<br>$\pm$ 0.0028 | 0.3791<br>$\pm$ 0.0010   |
| F3         | Dioxin    | M   | 550.7***<br>$\pm$ 6.46 | 0.7961<br>$\pm$ 0.0116  | 0.1890<br>$\pm$ 0.0047   | 0.1301<br>$\pm$ 0.0031 | 0.2597<br>$\pm$ 0.0035 | 0.3419**<br>$\pm$ 0.0047 |

Asterisks (\*, \*\*, \*\*\*), if present, indicate statistically significant differences between means of control and dioxin lineage rats ( $P < 0.05$ ,  $P < 0.01$  and  $P < 0.001$  respectively). The number of animals were as follows: F1 control 22, F1 dioxin 13, F3 control 56, F3 dioxin 45.
