# Supplementary material for: Dioxin (TCDD) Induces Epigenetic Transgenerational Inheritance of Adult Onset Disease and Sperm Epimutations
Source: PubMed Central journal article supplement (PMC3458876; doi:10.1371/journal.pone.0046249), 2012-09-26
Supplement: pone.0046249.s003.pdf [file pone.0046249.s003.pdf]

**Supplemental Table S2A.** Individual disease/abnormality incidence in F1 generation female rats of control and dioxin lineages.

| Animal | Animal ID  | Sex | Age  | Puberty | PFL | PCO | Kidney | Tumor | Obesity | Total Disease |
|--------|------------|-----|------|---------|-----|-----|--------|-------|---------|---------------|
| C1     | DCS0-1-1-1 | F   | 1 Yr | -       | -   | -   | -      | -     | -       |               |
| C2     | DCS0-1-1-2 | F   | 1 Yr | -       |     |     | -      | -     | -       |               |
| C3     | DCS0-1-1-3 | F   | 1 Yr | -       |     |     | +      | -     | -       | 1             |
| C4     | DCR1-1-2-1 | F   | 1 Yr | -       | -   | -   | -      | -     | -       |               |
| C5     | DCR1-1-2-2 | F   | 1 Yr | -       |     |     | -      | -     | -       |               |
| C6     | DCR1-1-2-3 | F   | 1 Yr | -       |     |     |        | +     | -       | 1             |
| C7     | DCB1-1-3-1 | F   | 1 Yr | -       |     |     | -      | -     | -       |               |
| C8     | DCB1-1-3-2 | F   | 1 Yr | -       |     |     |        | -     | -       |               |
| C9     | DCF1-1-4-1 | F   | 1 Yr | -       | -   | -   | -      | +     | -       | 1             |
| C10    | DCF1-1-4-2 | F   | 1 Yr | -       | -   | -   | -      | -     | -       |               |
| C11    | DCF1-1-4-3 | F   | 1 Yr | -       | -   | -   | +      | -     | -       | 1             |
| C12    | DCL1-1-5-1 | F   | 1 Yr | -       | +   | -   | +      | -     | -       | 2             |
| C13    | DCL1-1-5-2 | F   | 1 Yr | -       |     |     | -      | -     | -       |               |
| C14    | DCL1-1-5-3 | F   | 1 Yr | -       | -   | -   | -      | -     | -       |               |
| C15    | DCM2-1-6-1 | F   | 1 Yr | -       | -   | -   | -      | -     | -       |               |
| C16    | DCM2-1-6-2 | F   | 1 Yr | +       |     |     | -      | -     | -       | 1             |
| C17    | DCM2-1-6-3 | F   | 1 Yr | +       | -   | -   | -      | -     | -       | 1             |
| C18    | DCF0-1-7-1 | F   | 1 Yr | -       |     |     | -      | -     | -       |               |
| C19    | DCF0-1-7-2 | F   | 1 Yr | -       |     |     | -      | -     | -       |               |
| C20    | DCF0-1-7-3 | F   | 1 Yr | -       |     |     | -      | -     | -       |               |

**Supplemental Table S2A (continued)**

| Animal | Animal ID  | Sex | Age  | Puberty | PFL | PCO | Kidney | Tumor | Obesity | Total Disease |
|--------|------------|-----|------|---------|-----|-----|--------|-------|---------|---------------|
| H1     | DHB0-1-1-2 | F   | 1 Yr | -       | +   | +   | -      | -     | -       | 2             |
| H2     | DHB0-1-1-3 | F   | 1 Yr | -       | +   | -   | -      | -     | -       | 1             |
| H3     | DHG2-1-3-2 | F   | 1 Yr | -       | +   | +   | +      | -     | -       | 3             |
| H4     | DHG2-1-3-3 | F   | 1 Yr | +       | +   | -   | -      | -     | -       | 2             |
| H5     | DHG2-1-3-4 | F   | 1 Yr | -       | +   | -   | -      | -     | -       | 1             |
| H6     | DHW1-1-4-2 | F   | 1 Yr | -       |     |     |        | -     | -       |               |
| H7     | DHW1-1-4-4 | F   | 1 Yr | -       | +   | +   | -      | -     | -       | 2             |
| H8     | DHW1-1-4-5 | F   | 1 Yr | -       | +   | +   | -      | -     | -       | 2             |
| H9     | DHW1-1-4-7 | F   | 1 Yr | -       |     |     |        | -     | -       |               |

A '+' indicates the presence; A '-' indicates the absence of disease. A blank cell indicates 'not determined.' Animal IDs with a 'C' belong to Control lineage and those with an 'H' belong to Dioxin lineage. PFL = Primordial follicle loss. PCO = Polycystic ovarian disease. See 'Materials and Methods' section for disease assessment in rats. The number of animals per litter (litter representation) mean  $\pm$  SEM between the control versus dioxin lineage for each specific disease/abnormality was not found to be statistically different ( $p > 0.05$ ) for litter representation indicating no litter bias.

**Supplemental Table S2B.** Individual disease/abnormality incidence in F1 generation male rats of control and dioxin lineages.

| Animal | Animal ID   | Sex | Age  | Puberty | Testis | Prostate | Kidney | Tumor | Obesity | Total Disease |
|--------|-------------|-----|------|---------|--------|----------|--------|-------|---------|---------------|
| C1     | DCS0-1-1-5  | M   | 1 Yr | -       | +      | -        | -      | -     | -       | 1             |
| C2     | DCS0-1-1-6  | M   | 1 Yr | -       | -      | -        | -      | -     | -       |               |
| C3     | DCR1-1-2-5  | M   | 1 Yr | -       | -      | -        | -      | -     | -       |               |
| C4     | DCR1-1-2-6  | M   | 1 Yr | -       | -      | -        | -      | -     | -       |               |
| C5     | DCR1-1-2-7  | M   | 1 Yr | -       | -      | +        | -      | -     | -       | 1             |
| C6     | DCR1-1-2-8  | M   | 1 Yr | -       | -      | -        | -      | -     | -       |               |
| C7     | DCB1-1-3-3  | M   | 1 Yr | -       | +      | -        | -      | -     | -       | 1             |
| C8     | DCB1-1-3-4  | M   | 1 Yr | -       | -      | -        | -      | -     | -       |               |
| C9     | DCF1-1-4-6  | M   | 1 Yr | -       | -      | -        | -      | -     | -       |               |
| C10    | DCF1-1-4-7  | M   | 1 Yr | +       | -      | +        | -      | -     | -       | 2             |
| C11    | DCF1-1-4-8  | M   | 1 Yr | -       | -      | -        | -      | -     | -       |               |
| C12    | DCF1-1-4-9  | M   | 1 Yr | +       | -      | -        | -      | -     | -       | 1             |
| C13    | DCL1-1-5-6  | M   | 1 Yr | -       | -      | -        | -      | -     | -       |               |
| C14    | DCL1-1-5-7  | M   | 1 Yr | -       | -      | +        | -      | -     | -       | 1             |
| C15    | DCL1-1-5-8  | M   | 1 Yr | -       | -      | -        | -      | -     | -       |               |
| C16    | DCL1-1-5-9  | M   | 1 Yr | -       | -      | +        | -      | -     | -       | 1             |
| C17    | DCM2-1-6-7  | M   | 1 Yr | +       | -      | +        | -      | -     | -       | 2             |
| C18    | DCM2-1-6-9  | M   | 1 Yr | +       | +      | -        | -      | -     | -       | 2             |
| C19    | DCM2-1-6-10 | M   | 1 Yr | -       | +      | -        | -      | -     | -       | 1             |
| C20    | DCF0-1-7-5  | M   | 1 Yr | -       | -      | -        | -      | -     | -       |               |
| C21    | DCF0-1-7-6  | M   | 1 Yr | -       | -      | -        | +      | -     | -       | 1             |
| C22    | DCF0-1-7-7  | M   | 1 Yr | -       | -      | -        | -      | -     | -       |               |

**Supplemental Table S2B (continued)**

| Animal | Animal ID  | Sex | Age  | Puberty | Testis | Prostate | Kidney | Tumor | Obesity | Total Disease |
|--------|------------|-----|------|---------|--------|----------|--------|-------|---------|---------------|
| H1     | DHB0-1-1-4 | M   | 1 Yr | +       | -      | +        |        | -     | -       | 2             |
| H2     | DHB0-1-1-5 | M   | 1 Yr | -       | +      | +        | -      | -     | -       | 2             |
| H3     | DHB0-1-1-6 | M   | 1 Yr | -       | -      | +        | -      | -     | -       | 1             |
| H4     | DHB0-1-1-7 | M   | 1 Yr | -       | -      | +        | -      | -     | -       | 1             |
| H5     | DHB0-1-1-8 | M   | 1 Yr | -       | +      | +        | +      | -     | -       | 3             |
| H6     | DHB0-1-1-9 | M   | 1 Yr | -       | -      | +        | -      | -     | -       | 1             |
| H7     | DHK2-1-2-2 | M   | 1 Yr | -       | +      | -        | -      | -     | -       | 1             |
| H8     | DHK2-1-2-3 | M   | 1 Yr | +       | -      | -        | -      | -     | -       | 1             |
| H9     | DHK2-1-2-4 | M   | 1 Yr | +       | +      | +        | +      |       | -       | 4             |
| H10    | DHK2-1-2-5 | M   | 1 Yr | +       | +      | -        | +      | -     | -       | 3             |
| H11    | DHK2-1-2-6 | M   | 1 Yr | +       | -      | +        | -      | -     | -       | 2             |
| H12    | DHG2-1-3-5 | M   | 10 m | -       |        |          |        | +     | -       | 1             |
| H13    | DHG2-1-3-6 | M   | 1 Yr | -       |        | +        | -      | -     | -       | 1             |

A '+' indicates the presence; A '-' indicates the absence of disease. A blank cell indicates 'not determined.' Animal IDs with a 'C' belong to control lineage and those with an 'H' belong to dioxin lineage. See 'Materials and Methods' section for disease assessment in rats. The number of animals per litter (litter representation) mean  $\pm$  SEM between the control versus dioxin lineage for each specific disease/abnormality was not found to be statistically different ( $p > 0.05$ ) for litter representation indicating no litter bias.
