# Supplementary material for: Dioxin (TCDD) Induces Epigenetic Transgenerational Inheritance of Adult Onset Disease and Sperm Epimutations
Source: PubMed Central journal article supplement (PMC3458876; doi:10.1371/journal.pone.0046249), 2012-09-26
Supplement: pone.0046249.s004.pdf [file pone.0046249.s004.pdf]

**Supplemental Table S3A.** Individual disease/abnormality incidence in F3 generation female rats of control and dioxin lineages.

| Animal | Animal ID  | Sex | Age  | Puberty | PFL | PCO | Kidney | Tumor | Obesity | Total Disease |
|--------|------------|-----|------|---------|-----|-----|--------|-------|---------|---------------|
| C1     | DCF1-3-1-2 | F   | 1 Yr | -       |     |     | -      | -     | -       |               |
| C2     | DCF1-3-1-3 | F   | 1 Yr | -       |     |     | -      | -     | -       |               |
| C3     | DCF1-3-1-4 | F   | 1 Yr | -       |     |     | -      | -     | -       |               |
| C4     | DCF1-3-1-5 | F   | 1 Yr | -       |     |     |        | -     | -       |               |
| C5     | DCS0-3-2-2 | F   | 1 Yr | -       |     |     | -      | -     | -       |               |
| C6     | DCS0-3-2-3 | F   | 1 Yr | -       | -   | -   | -      | -     | -       |               |
| C7     | DCS0-3-2-4 | F   | 1 Yr | -       |     |     |        | -     | -       |               |
| C8     | DCS0-3-2-5 | F   | 1 Yr | -       |     |     |        | -     | -       |               |
| C9     | DCL1-3-3-2 | F   | 1 Yr | -       | -   | -   | +      | -     | -       | 1             |
| C10    | DCL1-3-3-3 | F   | 1 Yr | -       |     |     |        | +     | -       | 1             |
| C11    | DCB1-3-4-2 | F   | 1 Yr | -       |     |     | -      | -     | -       |               |
| C12    | DCB1-3-4-3 | F   | 1 Yr | -       |     |     | -      | -     | -       |               |
| C13    | DCB1-3-4-4 | F   | 1 Yr | -       |     |     | -      | -     | -       |               |
| C14    | DCB1-3-4-5 | F   | 1 Yr | -       | -   | -   |        | -     | -       |               |
| C15    | DCB1-3-4-6 | F   | 1 Yr | -       |     |     |        | -     | -       |               |
| C16    | DCS0-3-5-2 | F   | 1 Yr | -       |     |     | +      | -     | -       | 1             |
| C17    | DCS0-3-5-3 | F   | 1 Yr | -       |     |     | -      | -     | -       |               |
| C18    | DCS0-3-5-4 | F   | 1 Yr | -       |     |     | -      | -     | -       |               |
| C19    | DCS0-3-5-5 | F   | 1 Yr | -       |     |     | -      | -     | -       |               |
| C20    | DCS0-3-5-6 | F   | 1 Yr | -       | -   | -   |        | -     | -       |               |
| C21    | DCS0-3-6-2 | F   | 1 Yr | -       |     |     | +      | -     | -       | 1             |
| C22    | DCS0-3-6-3 | F   | 1 Yr | -       | +   | -   | -      | -     | -       | 1             |
| C23    | DCB1-3-7-2 | F   | 1 Yr | -       | -   | -   |        | -     | -       |               |

**Supplemental Table S3A (continued)**

| Animal | Animal ID   | Sex | Age   | Puberty | PFL | PCO | Kidney | Tumor | Obesity | Total Disease |
|--------|-------------|-----|-------|---------|-----|-----|--------|-------|---------|---------------|
| C24    | DCB1-3-7-3  | F   | 1 Yr  | -       |     |     | -      | -     | -       |               |
| C25    | DCB1-3-7-4  | F   | 1 Yr  | -       |     |     |        | -     | -       |               |
| C26    | DCB1-3-7-5  | F   | 1 Yr  | -       |     |     |        | -     | -       |               |
| C27    | DCB1-3-7-6  | F   | 1 Yr  | -       |     |     |        | -     | -       |               |
| C28    | DCR1-3-8-2  | F   | 1 Yr  | -       | -   | -   |        | -     | -       |               |
| C29    | DCR1-3-8-3  | F   | 1 Yr  | -       |     |     | -      | -     | -       |               |
| C30    | DCR1-3-8-4  | F   | 1 Yr  | -       |     |     | -      | -     | -       |               |
| C31    | DCR1-3-8-5  | F   | 1 Yr  | -       |     |     |        | -     | -       |               |
| C32    | DCF1-3-9-2  | F   | 1 Yr  | -       | -   | -   |        | -     | -       |               |
| C33    | DCF1-3-9-3  | F   | 1 Yr  | -       |     |     | -      | -     | -       |               |
| C34    | DCF1-3-9-4  | F   | 1 Yr  | +       |     |     | -      | -     | -       | 1             |
| C35    | DCF1-3-9-5  | F   | 1 Yr  |         |     |     |        | -     | -       |               |
| C36    | DCB1-3-10-2 | F   | 1 Yr  | -       |     |     |        | -     | -       |               |
| C37    | DCB1-3-10-3 | F   | 1 Yr  | -       | -   | -   | -      | -     | -       |               |
| C38    | DCB1-3-10-4 | F   | 1 Yr  | -       |     |     | -      | -     | -       |               |
| C39    | DCL1-3-11-2 | F   | 10 m. | -       |     |     |        | +     | -       | 1             |
| C40    | DCL1-3-11-3 | F   | 1 Yr  | -       |     |     | -      | -     | -       |               |
| C41    | DCL1-3-11-4 | F   | 1 Yr  | -       |     |     | -      | -     | -       |               |
| C42    | DCL1-3-11-5 | F   | 1 Yr  | -       |     |     | -      | -     | -       |               |
| C43    | DCL1-3-11-6 | F   | 1 Yr  | -       |     |     |        | -     | -       |               |
| C44    | DCL1-3-11-8 | F   | 11 m. | -       |     |     |        | +     | -       | 1             |
| C45    | DCB1-3-12-2 | F   | 1 Yr  | -       |     |     |        | -     | -       |               |
| C46    | DCB1-3-12-3 | F   | 1 Yr  | -       |     |     | -      | -     | -       |               |
| C47    | DCL1-3-13-1 | F   | 1 Yr  | -       |     |     | -      | -     | -       |               |
| C48    | DCL1-3-13-2 | F   | 1 Yr  | -       |     |     |        | -     | -       |               |

**Supplemental Table S3A (continued)**

| Animal | Animal ID   | Sex | Age   | Puberty | PFL | PCO | Kidney | Tumor | Obesity | Total Disease |
|--------|-------------|-----|-------|---------|-----|-----|--------|-------|---------|---------------|
| C49    | DCL1-3-13-3 | F   | 1 Yr  | -       |     |     | -      | -     | -       |               |
| C50    | DCS0-3-14-2 | F   | 1 Yr  | -       |     |     |        | -     | -       |               |
| C51    | DCS0-3-14-3 | F   | 1 Yr  | -       |     |     | -      | -     | -       |               |
| C52    | DCL1-3-15-2 | F   | 1 Yr  | +       |     |     | -      | -     | -       | 1             |
| C53    | DCL1-3-15-3 | F   | 1 Yr  | +       |     |     | +      | -     | -       | 2             |
| C54    | DCL1-3-15-4 | F   | 1 Yr  | +       |     |     | +      | -     | -       | 2             |
| C55    | DCL1-3-15-5 | F   | 1 Yr  | -       |     |     |        | -     | -       |               |
| C56    | DCS0-3-16-2 | F   | 1 Yr  | -       |     |     |        | -     | -       |               |
| C57    | DCS0-3-16-3 | F   | 1 Yr  | -       |     |     | -      | -     | -       |               |
| C58    | DCS0-3-16-4 | F   | 1 Yr  | -       |     |     | -      | -     | -       |               |
| C59    | DCS0-3-16-5 | F   | 1 Yr  | -       |     |     |        | -     | -       |               |
| C60    | DCR1-3-17-1 | F   | 1 Yr  | -       |     |     |        | -     | -       |               |
| C61    | DCR1-3-17-2 | F   | 1 Yr  | -       |     |     | -      | -     | -       |               |
| C62    | DCR1-3-17-3 | F   | 1 Yr  | -       |     |     | -      | -     | -       |               |
| C63    | DCR1-3-17-4 | F   | 1 Yr  | +       |     |     |        | -     | -       | 1             |
| C64    | DCS0-3-18-2 | F   | 1 Yr  |         |     |     |        | -     | -       |               |
| C65    | DCS0-3-18-3 | F   | 1 Yr  |         |     |     | -      | -     | -       |               |
| C66    | DCS0-3-18-4 | F   | 1 Yr  |         |     |     | -      | -     | -       |               |
| C67    | DCF1-3-19-1 | F   | 1 Yr  | -       |     |     |        | -     | -       |               |
| C68    | DCF1-3-19-2 | F   | 1 Yr  | -       |     |     | -      | -     | -       |               |
| C69    | DCF1-3-19-3 | F   | 11 m. | -       |     |     |        | +     | -       |               |

| Animal | Animal ID   | Sex | Age  | Puberty | PFL | PCO | Kidney | Tumor | Obesity | Total Disease |
|--------|-------------|-----|------|---------|-----|-----|--------|-------|---------|---------------|
| H1     | DHG2-3-1-3  | F   | 1 Yr | -       | +   | +   | -      | -     | -       | 2             |
| H2     | DHB0-3-2-3  | F   | 1 Yr | -       |     |     | -      | -     | -       |               |
| H3     | DHB0-3-2-4  | F   | 1 Yr | -       | +   | +   | -      | -     | -       | 2             |
| H4     | DHB0-3-2-5  | F   | 1 Yr | -       |     |     | -      | -     | -       |               |
| H5     | DHG2-3-3-3  | F   | 1 Yr | -       |     |     | -      | -     | -       |               |
| H6     | DHG2-3-3-4  | F   | 1 Yr | -       | +   | +   | -      | -     | -       | 2             |
| H7     | DHG2-3-3-5  | F   | 1 Yr | -       |     |     | -      | -     | -       |               |
| H8     | DHW1-3-4-3  | F   | 1 Yr | -       | +   | +   | -      | -     | -       | 2             |
| H9     | DHW1-3-5-3  | F   | 1 Yr | -       |     |     | -      | -     | -       |               |
| H10    | DHW1-3-5-4  | F   | 1 Yr | -       | -   | +   | -      | -     | -       | 1             |
| H11    | DHW1-3-5-5  | F   | 1 Yr | +       |     |     | +      | -     | -       | 2             |
| H12    | DHB0-3-6-2  | F   | 1 Yr | +       | -   | +   | -      | -     | -       | 2             |
| H13    | DHB0-3-6-3  | F   | 1 Yr | +       |     |     | -      | -     | -       | 1             |
| H14    | DHG2-3-7-2  | F   | 1 Yr | -       | +   | +   | -      | -     | -       | 2             |
| H15    | DHK2-3-8-3  | F   | 1 Yr | -       | +   | +   | +      | -     | -       | 3             |
| H16    | DHK2-3-8-4  | F   | 1 Yr | -       |     |     | -      | +     | -       | 1             |
| H17    | DHK2-3-8-5  | F   | 1 Yr | +       |     |     | -      | -     | -       | 1             |
| H18    | DHW1-3-9-3  | F   | 1 Yr | +       |     |     | +      | -     | -       | 2             |
| H19    | DHW1-3-9-4  | F   | 1 Yr | +       | -   | +   | +      | -     | -       | 3             |
| H20    | DHW1-3-9-5  | F   | 1 Yr | -       |     |     | -      | -     | -       |               |
| H21    | DHW1-3-9-6  | F   | 1 Yr | -       |     |     |        | -     | -       |               |
| H22    | DHG2-3-10-1 | F   | 1 Yr | +       |     |     | -      | -     | -       | 1             |
| H23    | DHG2-3-10-2 | F   | 1 Yr | +       |     |     | -      | -     | -       | 1             |
| H24    | DHK2-3-11-1 | F   | 1 Yr | +       |     |     | -      | -     | -       | 1             |
| H25    | DHK2-3-11-2 | F   | 1 Yr | +       |     |     | -      | -     | -       | 1             |
| H26    | DHK2-3-11-3 | F   | 1 Yr | +       |     |     | -      | -     | -       | 1             |

| Animal | Animal ID   | Sex | Age   | Puberty | PFL | PCO | Kidney | Tumor | Obesity | Total Disease |
|--------|-------------|-----|-------|---------|-----|-----|--------|-------|---------|---------------|
| H27    | DHK2-3-11-4 | F   | 10 m. | +       |     |     |        | +     | -       | 2             |
| H28    | DHK2-3-11-5 | F   | 1 Yr  | +       |     |     |        | -     | -       | 1             |
| H29    | DHK2-3-11-6 | F   | 1 Yr  | +       |     |     |        | -     | -       | 1             |
| H30    | DHB0-3-12-1 | F   | 1 Yr  | -       |     |     | -      | -     | -       |               |
| H31    | DHB0-3-12-2 | F   | 1 Yr  | -       |     |     | +      | -     | -       | 1             |
| H32    | DHB0-3-12-3 | F   | 1 Yr  | -       |     |     | -      | -     |         |               |
| H33    | DHW1-3-13-1 | F   | 1 Yr  | +       |     |     | -      | -     |         | 1             |
| H34    | DHW1-3-13-2 | F   | 10 m. | +       |     |     | -      | -     |         | 1             |
| H35    | DHW1-3-13-3 | F   | 1 Yr  | +       |     |     |        | -     |         | 1             |
| H36    | DHW1-3-13-4 | F   | 1 Yr  | +       |     |     | +      | -     |         | 2             |
| H37    | DHW1-3-13-6 | F   | 1 Yr  | +       |     |     |        | -     |         | 1             |
| H38    | DHG2-3-14-1 | F   | 1 Yr  | +       |     |     | -      | -     |         | 1             |
| H39    | DHG2-3-14-2 | F   | 1 Yr  | +       |     |     | -      | -     |         | 1             |
| H40    | DHG2-3-14-3 | F   | 1 Yr  | +       |     |     | -      | -     |         | 1             |
| H41    | DHG2-3-14-5 | F   | 1 Yr  | +       |     |     |        | +     |         | 2             |

A '+' indicates the presence and a '-' indicates the absence of disease. Animal IDs with a 'C' belong to control lineage and those with an 'H' belong to dioxin lineage. PFL = Primordial follicle loss; PCO = Polycystic ovarian disease. See 'Materials and Methods' section for disease assessment in rats. The number of animals per litter (litter representation) mean  $\pm$  SEM between the control versus dioxin lineage for each specific disease/abnormality was not found to be statistically different ( $p > 0.05$ ) for litter representation indicating no litter bias.

**Supplemental Table S3B.** Individual disease/abnormality incidence in F3 generation male rats of control and dioxin lineages.

| Animal | Animal ID   | Sex | Age  | Pubertal | Testis | Prostate | Kidney | Tumor | Obesity | Total Disease |
|--------|-------------|-----|------|----------|--------|----------|--------|-------|---------|---------------|
| C1     | DCF1-3-1-8  | M   | 1 Yr | -        | +      |          | -      | -     | -       | 1             |
| C2     | DCF1-3-1-9  | M   | 1 Yr | -        |        | -        | -      | -     | -       |               |
| C3     | DCF1-3-1-10 | M   | 1 Yr | -        |        | -        | +      | -     | -       | 1             |
| C4     | DCS0-3-2-11 | M   | 1 Yr | -        | -      | -        | -      | -     | -       |               |
| C5     | DCS0-3-2-12 | M   | 1 Yr | -        | -      | -        | -      | -     | -       |               |
| C6     | DCS0-3-2-13 | M   | 1 Yr | -        | -      |          | -      | -     | -       |               |
| C7     | DCL1-3-3-6  | M   | 1 Yr | -        | -      | -        |        | -     | -       |               |
| C8     | DCL1-3-3-7  | M   | 1 Yr | -        | -      | -        |        | -     | -       |               |
| C9     | DCB1-3-4-9  | M   | 1 Yr | -        | -      | +        | -      | -     | -       | 1             |
| C10    | DCB1-3-4-10 | M   | 1 Yr | -        | -      | -        | -      | -     | -       |               |
| C11    | DCB1-3-4-11 | M   | 1 Yr | -        | -      | -        | -      | -     | -       |               |
| C12    | DCB1-3-4-12 | M   | 1 Yr | -        |        |          |        | -     | -       |               |
| C13    | DCB1-3-4-13 | M   | 1 Yr | -        |        |          |        | -     | -       |               |
| C14    | DCS0-3-5-9  | M   | 1 Yr | -        | -      |          | -      | -     | -       |               |
| C15    | DCS0-3-5-10 | M   | 1 Yr | -        | -      | -        | -      | -     | -       |               |
| C16    | DCS0-3-5-11 | M   | 1 Yr | -        | -      | -        | -      | -     | -       |               |
| C17    | DCS0-3-6-6  | M   | 1 Yr | -        | -      |          | -      | -     | -       |               |
| C18    | DCS0-3-6-7  | M   | 1 Yr | -        | -      | -        | -      | -     | -       |               |
| C19    | DCS0-3-6-8  | M   | 1 Yr | -        | +      | -        | -      | -     | -       | 1             |
| C20    | DCB1-3-7-9  | M   | 1 Yr | -        | -      |          | +      | -     | -       | 1             |
| C21    | DCB1-3-7-10 | M   | 1 Yr | -        | -      | -        | -      | -     | -       |               |
| C22    | DCB1-3-7-11 | M   | 1 Yr | -        | -      | -        | -      | -     | -       |               |
| C23    | DCR1-3-8-7  | M   | 1 Yr | -        | -      | -        | -      | -     | -       |               |
| C24    | DCR1-3-8-8  | M   | 1 Yr | -        | -      | -        | -      | -     | -       |               |

**Supplemental Table S3B (continued)**

| Animal | Animal ID    | Sex | Age  | Pubertal | Testis | Prostate | Kidney | Tumor | Obesity | Total Disease |
|--------|--------------|-----|------|----------|--------|----------|--------|-------|---------|---------------|
| C25    | DCF1-3-9-11  | M   | 1 Yr | -        | -      | -        | -      | -     | -       |               |
| C26    | DCF1-3-9-12  | M   | 1 Yr | -        | -      | -        | -      | -     | -       |               |
| C27    | DCF1-3-9-13  | M   | 1 Yr | +        | -      | -        | -      | -     | -       | 1             |
| C28    | DCB1-3-10-9  | M   | 9 m. | -        | -      | -        | -      | +     | -       | 1             |
| C29    | DCB1-3-10-10 | M   | 1 Yr | -        | -      | -        | -      | -     | -       |               |
| C30    | DCB1-3-10-11 | M   | 1 Yr | -        | -      | -        | -      | -     | -       |               |
| C31    | DCB1-3-10-12 | M   | 1 Yr | -        | +      | -        | -      | -     | -       | 1             |
| C32    | DCB1-3-10-13 | M   | 11m. | -        | -      | -        | -      | +     | -       | 1             |
| C33    | DCL1-3-11-9  | M   | 1 Yr | -        | -      | -        | -      | -     | -       |               |
| C34    | DCL1-3-11-10 | M   | 1 Yr | -        | -      | +        | -      | -     | -       | 1             |
| C35    | DCL1-3-11-11 | M   | 1 Yr | -        | -      | -        | -      | -     | -       |               |
| C36    | DCB1-3-12-6  | M   | 1 Yr | -        | -      | -        | -      | -     | -       |               |
| C37    | DCB1-3-12-7  | M   | 1 Yr | -        | +      | +        | -      | -     | -       | 2             |
| C38    | DCB1-3-12-8  | M   | 1 Yr | -        | +      | -        | -      | -     | -       | 1             |
| C39    | DCL1-3-13-4  | M   | 1 Yr | -        | -      | -        | -      | -     | -       |               |
| C40    | DCS0-3-14-5  | M   | 1 Yr | -        | -      | -        | -      | -     | -       |               |
| C41    | DCS0-3-14-6  | M   | 1 Yr | -        | -      | -        | -      | -     | -       |               |
| C42    | DCS0-3-14-7  | M   | 1 Yr | -        | -      | -        | -      | -     | -       |               |
| C43    | DCL1-3-15-7  | M   | 1 Yr | +        | -      | -        | -      | -     | -       | 1             |
| C44    | DCL1-3-15-8  | M   | 1 Yr | +        | -      | +        | -      | -     | -       | 2             |
| C45    | DCL1-3-15-9  | M   | 1 Yr | +        | -      | -        | -      | -     | -       | 1             |
| C46    | DCS0-3-16-9  | M   | 1 Yr | -        | -      | -        | -      | -     | -       |               |
| C47    | DCS0-3-16-10 | M   | 1 Yr | -        | -      | -        | -      | -     | -       |               |
| C48    | DCS0-3-16-11 | M   | 1 Yr | -        | -      | -        | -      | -     | -       |               |
| C49    | DCS0-3-16-13 | M   | 1 Yr | -        | -      | -        | -      | -     | -       |               |

| Animal | Animal ID    | Sex | Age  | Pubertal | Testis | Prostate | Kidney | Tumor | Obesity | Total Disease |
|--------|--------------|-----|------|----------|--------|----------|--------|-------|---------|---------------|
| C50    | DCR1-3-17-8  | M   | 1 Yr | -        |        | -        | -      | -     | -       |               |
| C51    | DCS0-3-18-10 | M   | 1 Yr |          |        | -        | +      | -     | -       | 1             |
| C52    | DCS0-3-18-11 | M   | 1 Yr |          | +      | -        | +      | -     | -       | 2             |
| C53    | DCS0-3-18-12 | M   | 1 Yr |          | -      |          | -      | -     | -       |               |
| C54    | DCF1-3-19-4  | M   | 1 Yr | -        | -      |          | -      | -     | -       |               |
| C55    | DCF1-3-19-5  | M   | 1 Yr | -        | -      | -        |        | -     | -       |               |
| C56    | DCF1-3-19-6  | M   | 1 Yr | -        | -      | -        | -      | -     | -       |               |

| Animal | Animal ID   | Sex | Age  | Pubertal | Testis | Prostate | Kidney | Tumor | Obesity | Total Disease |
|--------|-------------|-----|------|----------|--------|----------|--------|-------|---------|---------------|
| H1     | DHG2-3-1-7  | M   | 1 Yr | -        | -      |          | -      | -     | -       |               |
| H2     | DHG2-3-1-8  | M   | 1 Yr | -        | -      | -        | -      | -     | -       |               |
| H3     | DHG2-3-1-9  | M   | 1 Yr | -        | -      | -        | -      | -     | -       |               |
| H4     | DHB0-3-2-14 | M   | 1 Yr | -        | -      | -        | -      | -     | -       |               |
| H5     | DHB0-3-2-15 | M   | 1 Yr | +        | -      | -        | -      | -     | -       | 1             |
| H6     | DHG2-3-3-6  | M   | 1 Yr | -        | -      | -        | +      | -     | -       | 1             |
| H7     | DHG2-3-3-9  | M   | 1 Yr | -        | -      | -        | +      | -     | -       | 1             |
| H8     | DHG2-3-3-10 | M   | 1 Yr | -        | -      | -        | +      | -     | -       | 1             |
| H9     | DHW1-3-4-6  | M   | 1 Yr | -        | -      | -        | -      | -     | -       |               |
| H10    | DHW1-3-4-7  | M   | 1 Yr | -        |        | -        | -      | -     | -       |               |
| H11    | DHW1-3-4-8  | M   | 1 Yr | +        | -      | -        | -      | -     | -       | 1             |
| H12    | DHW1-3-4-9  | M   | 9 m. | -        |        |          |        | -     | -       |               |
| H13    | DHB0-3-6-5  | M   | 1 Yr | -        | -      | -        | -      | -     | -       |               |
| H14    | DHB0-3-6-6  | M   | 1 Yr | -        | -      | -        | -      | -     | -       |               |
| H15    | DHB0-3-6-7  | M   | 1 Yr | -        | -      | +        | -      | -     | -       | 1             |
| H16    | DHG2-3-7-4  | M   | 1 Yr | -        | -      | -        | -      | -     | -       |               |
| H17    | DHG2-3-7-5  | M   | 1 Yr | -        | -      | -        | +      | -     | -       | 1             |



---

|     |              |   |      |   |   |   |   |   |   |   |
|-----|--------------|---|------|---|---|---|---|---|---|---|
| H18 | DHG2-3-7-6   | M | 1 Yr | - | + | - | - | - | - | 1 |
| H19 | DHK2-3-8-10  | M | 1 Yr | - | + | - | - | - | - | 1 |
| H20 | DHK2-3-8-11  | M | 1 Yr | - | - | - | + | - | - | 1 |
| H21 | DHK2-3-8-12  | M | 1 Yr | - | - | - | - | - | - |   |
| H22 | DHW1-3-9-10  | M | 1 Yr | - | - | - | - | - | - |   |
| H23 | DHW1-3-9-11  | M | 1 Yr | - | - | - | - | - | - |   |
| H24 | DHG2-3-10-3  | M | 1 Yr | - | + | - | - | - | - | 1 |
| H25 | DHG2-3-10-4  | M | 1 Yr | - | - | - | - | - | - |   |
| H26 | DHG2-3-10-5  | M | 1 Yr | - | - | - | + | + | - | 2 |
| H27 | DHG2-3-10-6  | M | 1 Yr | - |   |   |   | - | - |   |
| H28 | DHG2-3-10-7  | M | 1 Yr | - |   |   |   | - | - |   |
| H29 | DHG2-3-10-8  | M | 1 Yr | - |   |   |   | - | - |   |
| H30 | DHK2-3-11-9  | M | 1 Yr | - | - | - | - | - | - |   |
| H31 | DHK2-3-11-10 | M | 1 Yr | - | + | - | - | - | - | 1 |
| H32 | DHK2-3-11-11 | M | 1 Yr | - | + | - | - | - | - | 1 |
| H33 | DHB0-3-12-5  | M | 1 Yr | - | + | - | - | - | - | 1 |
| H34 | DHB0-3-12-6  | M | 1 Yr | - | + | - | + | - | - | 2 |
| H35 | DHB0-3-12-7  | M | 1 Yr | - | - | - | + | - | - | 1 |
| H36 | DHB0-3-12-8  | M | 1 Yr | - |   |   |   | - | - |   |
| H37 | DHB0-3-12-10 | M | 1 Yr | - |   |   |   | - | - |   |
| H38 | DHW1-3-13-7  | M | 1 Yr | - | + | - | + | - | - | 2 |
| H39 | DHW1-3-13-8  | M | 1 Yr | - | - | - | - | - | - |   |
| H40 | DHW1-3-13-9  | M | 1 Yr | - | - | - | + | - | - | 1 |
| H41 | DHG2-3-14-6  | M | 1 Yr | - | - | - | - | - | - |   |
| H42 | DHG2-3-14-7  | M | 1 Yr | - | - | - | - | - | - |   |
| H43 | DHG2-3-14-8  | M | 1 Yr | - | - | - | - | - | - |   |
| H44 | DHG2-3-14-9  | M | 1 Yr | - |   |   |   | - | - |   |

---

---

|     |              |   |      |   |   |   |
|-----|--------------|---|------|---|---|---|
| H45 | DHG2-3-14-10 | M | 1 Yr | - | - | - |
|-----|--------------|---|------|---|---|---|

---

A '+' indicates the presence and a '-' indicates the absence of disease. Animal IDs with a 'C' belong to control lineage and those with an 'H' belong to dioxin lineage. See 'Materials and Methods' section for disease assessment in rats. The number of animals per litter (litter representation) mean  $\pm$  SEM between the control versus dioxin lineage for each specific disease/abnormality was not found to be statistically different ( $p > 0.05$ ) for litter representation indicating no litter bias.
