# Supplementary material for: Dioxin (TCDD) Induces Epigenetic Transgenerational Inheritance of Adult Onset Disease and Sperm Epimutations
Source: PubMed Central journal article supplement (PMC3458876; doi:10.1371/journal.pone.0046249), 2012-09-26
Supplement: pone.0046249.s005.pdf [file pone.0046249.s005.pdf]

**Supplementary Table S4.** KEGG Pathways enriched with dioxin lineage DMR associated genes.

| <b>Pathway Name</b>                       | <b># Genes affected</b> | <b># Genes in Pathway</b> |
|-------------------------------------------|-------------------------|---------------------------|
| Ribosome                                  | 3                       | 77                        |
| Chemokine signaling pathway               | 3                       | 178                       |
| Axon guidance                             | 3                       | 123                       |
| Natural killer cell mediated cytotoxicity | 3                       | 98                        |
| ErbB signaling pathway                    | 2                       | 83                        |
| Neuroactive ligand-receptor interaction   | 2                       | 259                       |
| VEGF signaling pathway                    | 2                       | 69                        |
| Neurotrophin signaling pathway            | 2                       | 129                       |
| Cholinergic synapse                       | 2                       | 112                       |
| Regulation of actin cytoskeleton          | 2                       | 204                       |
| Insulin signaling pathway                 | 2                       | 130                       |
| GnRH signaling pathway                    | 2                       | 91                        |
| Gastric acid secretion                    | 2                       | 74                        |
| Pancreatic secretion                      | 2                       | 103                       |
| Tuberculosis                              | 2                       | 69                        |
| HTLV-I infection                          | 2                       | 296                       |
| Pathways in cancer                        | 2                       | 321                       |
| Renal cell carcinoma                      | 2                       | 69                        |
| Glioma                                    | 2                       | 64                        |
| Chronic myeloid leukemia                  | 2                       | 78                        |
